# Supplementary material for: Retrospective study: clinicopathological features and prognosis of idiopathic membranous nephropathy with seronegative anti-phospholipase A2 receptor antibody
Source: PeerJ. 2020 Feb 21;8:e8650. doi: 10.7717/peerj.8650 (PMC7039122; doi:10.7717/peerj.8650)
Supplement: File S1 [file peerj-08-8650-s001.xlsx]

## Sheet: Sheet1
NEW	OLD N	Number	Sex	Age	Time	Urine Protein	U RBC	24HUPRO	HGB	WBC	PLT	AST	ALT	SOD	TP	ALB	QLB	BUN	CREA	Cys0C	β20MG	RBP	C1q	Ca	CHOL	HDL0C	LDL0C	GLU	PLA2R	group	IgG4	IgG	IgM	IgA	C3	C4	Tissue IgG	Tissue IgM	Tissue IgA	Tissue C3	Tissue C1q	Tissue Fib	Telephone	SBP	DBP	Global sclerosis	Glomerular mesangial hyperplasia	Acute renal tubular lesions	Chronic renal tubular lesions
130	139	019460	0	35	120	4	7.8	5.2	117	3.79	313	19	14	113.8	54.5	28.7	25.8	4.5	45	0.73	1.54	59.7	208					5.43	15.17	1	166	6.13	1.11	1.78	1.36	0.39	0	0	0	0	0	0	13605389247			1	1	0	0
127	136	020353	0	62	330	4	6.9	1.82	121	3.95	218	11	21		40	28	12	10.4	53.4			70.1		2.54	16.5	2.49	2.95	6.5	18.57	1	104	2.44	0.42	0.7	1.14	0.24	1	0	0	0	0	0	13406052132			1	1	0	0
149	162	6326899	0	39	90	3	1.8	13.77	150	4.67	416	25	29	128.5	49.4	21.7	27.7	4.1	43	0.46	1.07	58	267	2.07	10.83	1.97	6.93	5.49	2	1	202	5.63	2.31	2.55	1.25	0.26	1	0	0	0	0	0		108	68	0	0	0	0
		6325189	1	50	1440	2	3.6	3.27	155	5.88	312	23	25	86	52.3	29.5	22.8	4	64.2	0.98	2.12	85	162	2.13	6	1.06	3.72	6.24	2.38	1	188	4.21	0.48	1.67	1.46	0.24	1	0	0	0	0	0	13854035718	116	73	0	0	1	1
		6296867	1	61	90	1	1.8	2.57	119	5.06	164	38	26	122.8	60.7	28.7	32	4.1	56	0.78	2.35	24.2	213	2.19	4.69	1.23	2.75	4.75	2	1					1.11	0.24	2	0	0	0	0	0	13562466584	125	67	1	1	0	0
		6297637	0	44	30	2	6.7	7.24	158	10.51	391	19	24	142.5	47.5	23.5	24	4.6	46	0.95	1.72	71.7	234	2.21	9.53	1.64	6.12	4.82	2	1	83	4.36	0.97	2.29	1.04	0.23	2	0	0	0	0	0	18264551053	134	83	1	0	0	0
		6303933	1	54	180	2	3.2	4.19	166	5.57	163	24	23	161.5	63.8	33.3	30.5	3.8	63	0.76	1.51	49.8	176	2.25	8.84	1.09	6.27	5.33	4.02	1							2	0	0	0	0	0	13562972578	115	78	0	0	0	0
19	19	14979	1	30		1	11.3	1.9	132	5.57	272	18	18		51	32	19	3.5	60.1	0.9	1.62	34.9		2.36	5.7	1.65	3.33	4.8	2	1	103	7.47	1.76	2	0.89	0.24	3	0	0	0	0	0				1	0	0	0
159	173	6325176	0	56	30	3	6	6.86	130	4.36	283	12	12	96.3	44.4	20.4	24	4.9	45	0.6	1.7	45.9	275	2.05	9.03	1.46	5.81	13.41	12.84	1	364	5.67	1.62	1.93	1.18	0.39	3	0	0	0	0	0		114	71	1	0	0	0
236	266	6271980	1	34	210	1	1.8	3.07	4.85	11.8	172	16	27	117.8	49.2	28.2	21	5.3	57	0.87	1.5	69.4	159	2.22	9.65	3.39	4.79	3.5	2	1	109	3.75	0.48	0.86			3	0	0	0	0	0	13686303656	135	76	1	0	0	0
		6295547	1	52	90	3	2	5.85	156	8.33	262	23	39	145.1	53.5	27.4	26.1	4.3	56	0.88	2.14	62.9	263	2.14	10.88	1.29	7.67	4.87	2	1	408	7.49	1.92	3.16	1.26	0.23	3	1	0	0	0	0	18769212333	113	87	1	1	0	0
187	205	6353033	1	47	30	3	29.5	8.45	171	9.58	339	37	54	109.2	46	23.6	22.4	6.3	68	1.16	1.67	72.2	241	2.08	10.39	1.24	6.5	6.75	15.8	1	134	3.84	1.19	1.97	1.2	0.27	1	0	0	1	0	0		136	97	1	0	0	0
13	13	015793	0	31	20	1	4.2	2.29	121	8.19	265	13	10		48	28	20	2.1	34	0.76	1.54	34.1		2.42	5.8	1.49	2.4	4.8	6.04	1	275	8.16	1.32	3.06	1.13	0.19	2	0	0	1	0	0	18953101258			0	0	0	0
231	261	6263250	1	18	20	3			4.46	8.56	279			79.6	38.5	17	21.5	4.3	72	1.06	2.06	44.2	160	1.98	11.31	2.27	7.49	4.83	19.88	1	54	1.39	1.02	0.84	0.9	0.15	2	0	0	1	0	0	15562762825	159	104	0	1	0	0
		6275296	0	45	360	3	3.6	2.11	147	5.88	247	25	20	140.3	57.5	28.4	29.1	3.8	48	0.6	1.68	66.6	221	2.23	6.69	1.33	3.35	5.1	2.18	1	1000	9.23	1.45	4.3	1.36	0.22	2	0	0	1	0	0	13655412316	124	94	0	1	0	0
97	104	13821	1	23		3	2.9	3.08	146	5.78	266	14	22		43	27	16	4.2	58.9	0.86	1.45	56		2.52	9.3	1.67	5.36	5.2	4.42	1	337	4.22	1.17	2.61	1.11	0.21	3	0	0	1	0	0				0	1	0	0
133	143	019266	0	34	15	4	32.1	15.42	153	4.38	275	19	10	125	43.5	19.4	24.1	3.1	57.1	0.66	1.68	45.6	227	2.46				6.25	5.82	1	123	3.46	1.7	1.43	1.23	0.33	3	0	0	1	0	0	15822713177			0	0	0	0
137	147	019530	1	53	180	3	9.2	4.52	142	4.72	256	23	22	97.1	41.3	22.8	18.5	4	72	0.9	1.82	57.5	189	1.9	6	1.3	3.39	3.96	6.13	1	332	4.04	0.9	1.88	0.97	0.3	3	0	0	1	0	0	13583454739			1	0	0	0
142	154	020546	0	30	330	1	0.4	2.01	118	4.49	82	42	18	203.8	70.2	37.1	33.1	10.5	79.45	6.39	2.88	39.7	150.35		2.57	0.96	1.5	9.85	2.51	1	427	6.87	1.26	2.16	1.12	0.27	3	0	0	1	0	0	13141426747			1	0	0	0
194	215	6363220	1	66	20	3	2	1.82	161	6.6	247	19	34	117.1	49	24.9	24.1	6.2	74	1.5	3.02	62.4	213	2.06	11.37	2.94	6.71	4.66	2	1							3	0	0	1	0	0		160	101	1	0	0	0
202	228	6269236	1	53	90	3	4.9	3.28	175	11.52	312	18	73	121.1	41.9	25	21.9	5.9	64	1.14	2.37	54.9	199					4.99	2	1							3	0	0	1	0	0		122	81	1	0	0	0
		6295784	1	46	180	3	9.2	7.49	147	12.89	203	15	17	125.8	55.2	30.9	24.3	5.3	82	0.98	2	82.7	233	2.22	7.82	1.98	4.54	4.6	2	1	472	4.7	0.85	2.56	1.26	0.33	3	0	0	1	0	0	13082757525	132	93	1	0	0	0
140	152	019891	0	25	30	3	33.4	1.87	130	4.34	274	19	16		54	34	20	4.2	34.6			29.5		2.61	4.7	1.18	2	4.9	3.08	1	148	8.93	1.71	3.04	1.17	0.25	3	1	0	1	0	0	18366103885			1	0	0	0
		6283010	0	60	30	4	55.9	7.22	116	5.26	144	28	19	92	46.6	21.8	24.8	7	73.8	1.07	3.45	45.6	217	2.01	7.65	1.34	4.95	5.26	15.13	1	199	8.26	0.83	1.76	1.1	0.34	3	1	0	1	0	0	13075380026	135	74	1	1	0	0
167	182	6334900	0	38	20	3	1.2	7.02	126	3.31	162	25	18	96	44.1	13.8	30.3	2.2	54	0.94	4.53	34.9	296	1.83	10.77	0.89	7.13	4.92	2	1	171	9.97	3.03	3.2	1.11	0.2	3	2	0	1	0	0		101	57	0	1	0	0
225	255	6300215	1	42	90	3	15.5	3.41	150	4.9	233	28	36	167.5	60.7	32.5	28.2	6.1	61	1.02	2.62	30.6	149	2.24	5.78	0.78	3.62	5.36	2.29	1	727	8.43	0.42	3.97	0.85	0.21	3	2	0	1	0	0	17515742784	153	110	1	1	0	0
214	244	6264639	1	46	14	3	3.9	15.05	175	7.38	350	34	43	96.3	44.8	18.8	26	6	90	2.59	2.59	52.9	205	2	10.78	1.57	7.95	4.96	2	1	1060	5.43	0.61	2.56	1.64	0.35	2	0	0	2	0	0		124	71	0	0	0	0
103	110	012597	0	64	60	2	1.7	2.84	146	9.13	167	14	30		41	28		5.4	24.9	0.85	1.36	44.4		2.42	8.4	2.36	3.8	15.4	2	1	138	2.76	0.68	1.57	0.98	0.31	3	0	0	2	0	0	13805412147			1	0	0	0
		6309407	0	50	180	2	10.1	2.45	123	5.98	284	42	34	145	52.6	27.2	25.4	7.5	44	0.93	1.14	56	231	2.07	9.85	1.86	6.26	7.36	4.19	1	229	8.41	1.58	1.98	1.13	0.23	3	0	0	2	0	0	15054589424	145	90	0	0	0	0
		6376346	1	52	30	4	10.2	6.72	118	9.01	296	20	11	88	39.6	17.2	22.4	7.2	71.3	1.31	2.61	60.8	204	1.75	12.16	1.61	9.11	4.81	5.67	1	0	3.9	0.76	2.2	1.1	0.44	3	0	0	2	0	0		156	87	1	0	0	0
125	134	019763	0	48	360	1	6.1	1.99	142	4.83	516	20	11	156.9	71	41.6	29.4	6.7	51	0.79	1.61	58.1	159	2.18	5.3	1.74	2.74	4.82	8.63	1	459	9.57	0.58	1.82	1.15	0.28	3	0	1	2	0	0	15165152269			1	0	0	0
233	263	6266485	1	52	15	3	1.8	6.06	4.93	10.47	254	14	16	119.7	55.2	29.7	25.5	7.5	75	0.91	1.96	84.4	211	2.31	9.83	1.59	7.32	5.55	4.83	1	710	6.27	0.64	1.12			3	0	1	2	0	0	15806847955	182	113	1	1	0	0
31	32	14292	0	21		2	3.2	5.57	155	6.41	324	22	13	113.1	48.6	18.6	29	2.5	50	0.6	1.69	32.3	258	2.44	13.6	1.89	8.28	4.5	2.86	1	56	2.9	1.84	2.62	1.06	0.31	3	2	0	0	1	0				0	1	0	0
148	161	6323266	0	59	30	1	5.7	1.64	132	16.54	291	21	42	111	47.4	28.2	19.2	7.8	51	1.51	2.06	90.1	200	2.25	7.62	3.64	2.47	3.91	17.9	1	189	5.38	1.45	2.59	1.08	0.3	1	0	0	1	1	0		152	90	1	1	0	0
185	203	667992	0	58	30	3	28.1	5.51	150	6.43	300	23	18	139.3	58.9	31.7	27.2	3.4	61	0.91	1.73	52.6	215	2.25	8.42	1.7	5.33	5.7	18.9	1	602	9.05	1.09	2.11	1.25	0.32	1	0	0	1	1	0		176	128	0	0	0	0
136	146	019537	1	44	120	2	8.8	2.52	139	4.58	263	18	19		41	24	17	5.1	55.5			60.3		2.54	6.7	1.42	3.94	4.9	3.48	1							3	0	0	1	1	0	15064021902			1	1	0	0
147	160	021507	1	45	20	3	4.1	5.7	169	5.51	169	26	39	96.2	42.3	20	22.3	3.6	72	0.85	1.99	46.3	212	1.9				4.66	2	1	123	2.69	1.73	2.21	1.16	0.31	3	0	0	1	1	0	15966623039			0	0	0	0
172	187	6338481	1	54		1	1.7	2.8	131	4.53	285	32	34	145.2	57.2	34.1	23.1	4.7	63	0.96	2.85	61.3	222	2.23	7.52	0.9	5.02	5.22	17.14	1	793	8.63	1.96	2.36	1.25	0.27	3	0	0	1	1	0		111	81	0	0	0	0
		6309426	1	44	30	3	7	5.64	133	4.47	245	17	21	88	41.4	20.3	21.1	4.6	95.1	0.92	2.26	55.7	200	1.86	6.32	0.98	3.94	5.48	4.25	1	220	4.04	0.99	1.79	1.32	0.29	3	0	0	1	1	0	16890129083	132	95	1	0	0	0
		6365217	1	64	30	2	14.9	0.83	161	5.19	229	29	26	127	61.8	31.9	29.9	7.4	72.3	0.96	1.69	81.1	184	2.35	8.22	1.77	4.63	6	2	1	1220	8.79	0.46	3.38	1.37	0.3	3	1	0	1	1	0	13969218777	119	77	1	0	0	0
53	57	012076	0	69	360	4	81.6	8.95	114	7.85	167	17	13	65.1	40.4	17.4	23	4.4	75	1.25	4.28	35	184	1.87					14.45	1	63	4.56	0.88	3.13	1.08	0.21	3	0	0	2	1	0	18764084739			1	1	1	1
		6241183	1	63	40	4	5.1	2.43	160	7.17	258	22	17	69	43.9	19.6	24.3	7.4	75.8	1.33	3.07	41.6	233	1.91				7.83	2.47	1		5.4					3	0	0	2	1	0	18660815165	131	75	1	0	0	0
17	17	10208	0	38		2	14.9	1.45	146	11.11	307	18	42		57	39	18	6.8	79.7	1.13	2.64			2.5	7.7	2.61	3.9	4.2	2	1	141	5.85	0.87	0.89	1.35	0.26	3	1	0	2	1	0				0	0	0	0
209	237	6267669	1	48	90	2	3.6	5.88	120	12.75	282					33.4			71				226					4.92	2	1							3	0	0	1	2	0		144	99	1	0	0	0
180	195	6345536	1	63	180	3	7.7	2.25	167	11.88	403	18	6	101.1	46.8	22.3	24.5	6.6	55	0.65	2.41	41.4	255	1.96	7.59	1.52	5.16	7.85	2.95	1	346	5.52	1.42	2.69	1.48	0.37	3	2	0	1	2	0		153	106	0	0	0	0
104	111	012645	0	29	20	3	27	4.82	108	5.8	330	27	34		42	24	18	5.7	60.2	0.77	1.89	36.8		2.44	7.8	1.78	4.53	4.6	12.35	1	54	6.02	0.81	1.82	0.87	0.23	3	0	0	2	2	0	18639379233			0	0	0	0
		6357769	0	16	3	15.8	0.88	126	6.15	271	24	13	22	137.7	56.5	32.5	24.1	3.8	42	0.6	1.51	31.5	220	2.05	7.83	1.97	4.67	5.11	3.05	1	495	7.71	1.29	1.27	1.49	0.25	3	2	0	2	2	0	13696370113	96	54	0	0	0	0
217	247	6249318	1	45	180	2	2.7	6.78	180	8.49	253	19	19	119.5	46.3	22.3	24	4	81	0.97	1.92	64.5	199	2.09	10.14	1.5	7.13	4.75	11.35	1	287	5.73	0.84	4.13	1.04	0.26	3	0	0	3	2	0		138	99	1	0	0	0
		6282882	0	45	20	3	27.7	3.5	143	17.48	537	26	30	125.9	57.8	26.3	31.5	6.5	55	0.99	1.66	73.4	230	2.26	11.26	1.98	6.4	3.8	6.54	1	299	6.63	1.35	3.21	1.48	0.3	3	0	0	3	2	0	13854037102	114	82	0	0	0	0
		6246253	0	22	180	4	10.8	5.52	111	9.38	575	45	12	79.4	37.5	14.7	22.8	2.7	50	0.68	1.82	23.5	196	1.99	11.09	1.15	8.64	5.54	2	1	331	3.12	2.01	1.42	0.89	0.1	2	3	2	3	2	0	18325434432	128	75	0	0	0	0
174	189	6321270	1	61	30	4	22.4	4.05	155	5.47	213	50	46	141.9	54.8	25.9	28.9	7.8	82	0.91	2.18	53.7	239	2.24	12.73	2.22	8.13	6.03	3.4	1	360	8.99	1.41	1.75	1.09	0.31	1	2	0	0	0	2		141	103	1	0	0	0
119	128	009772	0	63	120	3	8.1	3.78	137	16.38	295	28	38		41	24	27	9.3	61				269	2.05	11.7	2.56	6.72	4.1	7.6	1	194	3.49	1.04	2.21	1.11	0.25			3	3	3	2	15006737891			1	0	0	0
56	60	015756	1	36	60	3	2.9	5.06	129	5.68	247	16	20		45	28	17	5.4	55.7		1.85	62.8		2.3	4.8	0.97	2.58	5.1	9.95	1	285	4.54	0.97	2.6	1.3	0.38	1	0	0	0	0		13820046261			1	0	0	0
88	95	017012	0	58	300	2	8.7	3.54	128	7.68	201	21	32	75.2	43.9	24	19.9	5.1	40	1.1	1.69	64.3	182	1.97	9.5	1.81	4.64	5.05	14.11	1	104	3.2	0.99	1.13	1.35	0.23	1	0	0	0	0		18663588485			0	0	0	0
92	99	017637	0	43	10	3	5.4	8.36	141	4.86	288	31	23		50	28	22	4.3	43	0.55	1.52	39.3	192	1.98	11.9	2.01	7.48	5.41	2	1	177	4.78	0.67	2.06	1.59	0.51	2	0	0	1	0		13695316337			0	0	0	0
115	123	016890	0	46	300	3	2.2	4.74	147	11.39	254	17	25	113.3	50.4	30.5	19.9	5.6	49	1.03	1.5	75.5	172	2.01	5.2	2.26	1.97	4.39	2	1	369	5.73	0.65	3.07	1.18	0.28	3	0	0	1	0		15263077940			1	0	0	0
37	40	011041	1	24	60	4	46.4	9	140	7.55	226	33	27	69.8	28	17	11	9.5	94.6	1.33	3.77			2.3	9.1	1.69	6.17	4.9	2.26	1	54	1.35	1.03	0.73	0.97	0.23	3	0	0	2	2		15806936685			0	0	0	0
207	235	6265911	0	42	10	2	6.3	2.16	145	4.65	350	24	31	100.2	46.5	22.1	24.4	5.3	100	0.9	2.65	59.2	225	2.15	6.63	1.49	4.69	4.94	17.37	1	365	8.34	1	2.78	1.29	0.36								110	69	1	1	0	0
208	236	6264685	0	59	90	2	3.6	6.66	126	8.02	207	16	25	115.5	55.9	30.5	25.4	7.2	65	1.18	3.24	63	258	2.23	6.67	1.73	4.22	6.1	2	1	54	5.44	1.39	3.38	1.21	0.39								186	93	1	0	0	0
14	14	016635	0	50	10	2	38.5	3.57	118	5.28	197	22	31		43	24	19	5	41.1	0.76	2.31	42.5		2.22	9.4	1.85	5.75	4.6	185.32	2	316	6.97	2.2	1.67	0.95	0.26	0	0	0	0	0	0	15095002185			0	0	0	0
145	158	017889	1	57	30	3	10.9	3.06	140	4.26	203	23	32		48	29	19	5.6	81.3			41		2.3	10.6	3.23	5	7.4	86.09	2	811	5.36	0.72	2.86	1.14	0.36	0	0	0	0	0	0	13064038257			0	0	0	0
155	169	6313882	0	52	90	2	2.2	3.9	114	5.35	273	22	16	134.7	50.8	27.8	23	3.6	54	0.78	2.09	64.5	204	2.17	6.75	1.73	3.81	4.5	90.91	2	181	6	1.55	2.25	1.04	0.16	0	0	0	0	0	0		129	98	1	0	0	0
178	193	6348133	0	63	30	3	17.3	5.95	128	10.13	291																		81.43	2	166	4.28	1.36	1.77	1.03	0.23	0	0	0	0	0	0		155	82	1	1	0	0
		6254682	1	67	360	2	5	3.51	95	10.36	344	19	14	72	42.9	19.7	23.2	8.2	89	1.46	2.91	68.5	227	2.07	6.96	2.29	3.25	5.14	125.95	2	585	6.38	0.56	2.44	1.13	0.31	0	0	0	0	0	0	13562539236	137	70	1	0	0	0
162	177	6330526	0	55	120	1	3.6	1.83	135	7	258	20	27	103	55.5	28.5	27	6.9	63	1.37	3.87	63.5	279	2.22	9.57	3.21	4.64	3.5	217.23	2	324	6.69	1.76	2.04	1.26	0.28	1	0	0	0	0	0		112	68	1	0	0	0
199	224	6370829	1	57	360	3	21.5	5.69	151	8.97	230	15	16	99.7	49.3	23.1	28	10.1	79	1.18	1.47	57	200	2.08	12.01	2.43	8.12	5.29	337.53	2	278	7.13	1.2	1.93	1.16	0.34	1	0	0	0	0	0		157	96	1	0	0	0
203	231	6272822	0	62	60	3	2	5.68	136	5.71	208	16	12	111.9	52	24.3	27.7	5.6	69	1.35	3.96	61.9	238	2.25	9.5	1.84	5.96	8.64	53.29	2	365	7.46	1.22	4.09			1	0	0	0	0	0		128	80	1	0	1	1
21	21	14230	1	62		4	26.3	8.69	132	4.99	190	13	32		58	30	18	5.6	41.7	0.91	1.99	44.9		2.36	8.9	2.59	4.56	5.3	78.08	2	355	5.79	0.69	3.63	1.08	0.35	2	0	0	0	0	0				0	0	0	0
30	31	14801	0	49		2	2.5	3.16	131	5.89	354	23	16	110.7	50.5	23	27.5	4.2	62	0.81	2.24	38	245	2.06	9.8	2.28	5.61	4.29	80.94	2	313	7.33	1.95	3.64	1.19	0.22	2	0	0	0	0	0				1	0	1	1
32	33	15100	1	51		4	8.7	10.26	159	14.05	305	17	14	121	54.9	25.5	29.4	4.5	71	0.93	3.16	95.7	228	2.17	11.14	1.79	7.11	6.09	194.09	2	85	5.87	0.58	3.56	1.71	0.47	2	0	0	0	0	0				1	1	1	1
95	102	15732	1	33		3	15.5	5.44	138	6.44	236	22	16	110.4	39.4	18.8	20.6	4.7	65	0.62	1.73	41	239	1.89	11	1.78	7.64	6.71	647.79	2	325	2.98	0.82	3.47			2	0	0	0	0	0				0	0	0	0
109	117	015732	1	33	30	4	19537	5.44	138	6.44	236	22	16	110.4	39.4	18.8	20.6	4.7	65	0.62	1.73	41	239	1.89	11	1.78	7.64	4.3	647.79	2	325	2.98	0.82	3.47			2	0	0	0	0	0	18769736635			0	0	0	0
118	127	15100	1	51		4	8.7	2.42	159	14.05	305	17	14	121	54.9	25.5	29.4	4.5	71	0.93	3.16	95.7	228	2.17	11.14	1.79	7.11	6.09	194.09	2	85	5.87	0.58	3.56	1.71	0.47	2	0	0	0	0	0				1	1	1	1
		6336381	1	49	10	3	19.5	5.17	144	4.24	163	31	22	88	41.5	17.4	24.1	4.5	76.8	1.22	2.78	46.7	327	1.87	8.73	1.16	5.96	4.72	43.31	2	127	3.74	0.97	4.92	0.8	0.25	2	0	0	0	0	0	13792974506	121	72	0	1	0	0
		6307514	1	48	60	3	16.7	16.22	158	5.92	271	25	14	88.8	41.9	18.3	23.6	4.4	63	0.99	3	45.4	290	1.99	12.12	1.38	7.71	4.6	204.83	2	303	4.07	2.37	2.36	1.24	0.34	2	0	0	0	0	0	15165119729	164	117	0	1	0	0
		6306541	0	32	180	3	6.5	3.91	118	4	274	37	43	112.7	59.2	27	31.6	2.8	53	0.66	2.22	47.4	273	2.09	7.05	1.82	4.2	4.77	252.67	2	696	13.2	1.92	3.3	1.31	0.33	2	0	0	0	0	0	18705317391	136	87	0	0	0	0
27	27	13913	1	55		3	7.6	8.06	145	6.44	248	16	15	123.3	44.9	22.5	22.4	6.5	65	0.76	2.45	45.8	139	1.94				5.21	56.18	2	245	5.71	0.95	1.44	1.16	0.26	3	0	0	0	0	0				1	0	0	0
106	114	013927	1	54		2	3.6	4.2	134	10.49	376				47	31	16	6.3	46.1	1.3	2.16	79.1		2.55	10.3	2.18	6.11	3.9	1163.48	2	715	5.89	0.97	2.65	1.72	0.39	3	0	0	0	0	0	15865001986			1	0	0	0
132	142	019058	1	14	30	3	6.9	3.86	147	4.84	191	16	13		42	27	15	4.6	55.8			69		2.69	8.1	1.7	4.82	5.2	73.46	2	64	3.86	0.8	2.96	1.3	0.26	3	0	0	0	0	0	15965935432			0	0	0	0
151	164	6326998	1	60	20	3	8.1	8.9	157	4.01	206	25	31	101.7	39.3	20.2	19.1	5.2	56	0.91	3.09	51	178	1.96	8.86	1.17	6.16	5.82	238.99	2	140	3.2	0.57	2.71	1.16	0.23	3	0	0	0	0	0		130	72	1	1	0	0
154	168	6310489	1	23	90	3	44	5.36	143	4.71	175	21	14	92	35.2	18.4	16.8	4	75	0.85	1.99	48.4	182	1.86	7.93	1.13	5.12	5.16	131.7	2	219	2.21	1.04	0.93	0.92	0.22	3	0	0	0	0	0		147	82	0	1	0	0
221	251	6235287	1	31	20	3	2	11.54	173	5.9	240	28	28	131.7	45	23	22	3.2	77	0.84	2.4	68	233	2.14	4.4	1.49	1.99	4.8	172.3	2	438	4.76	1.12	1.8	1.37	0.31	3	0	0	0	0	0	15266836299	135	79	0	1	0	0
227	257	6310230	1	65	60	4	45	9.71	168	6.14	223	47	14	90.9	45.9	14	31.9	4	102	1.38	4.41	24.8	359	2.13		1.51	17.51	4.53	1262	2							3	0	0	0	0	0	13573109917	180	104	0	1	1	1
		6304073	1	38	180	3	2.9	14.78	165	7.15	326	15	22	139.5	51.2	24.3	26.9	3.8	55	0.71	1.73	57.4	221	2.14	8.65	1.02	5.64	4.83	217.96	2							3	0	0	0	0	0	15098902329	135	89	1	0	0	0
152	166	576732	1	62	360	3	1.8	12.02	132	7.06	222	19	17	102.9	52.1	28	24.1	7.4	104	1.8	5.21	67	216	2.17	4.96	1.09	2.75	5.7	111.77	2	277	5.15	0.98	1.47	1.6	0.32	2	1	0	0	0	0		133	86	1	0	1	1
128	137	021395	0	46	360	3	5	4.75	123	4.25	367	28	16		41	26	15	4.7	50.6			63.7		2.26	7.6	1.33	2.7	4.9	442.26	2	160	5.48	0.53	0.21	1.22	0.29	3	1	0	0	0	0	18953076638			1	1	0	1
224	254	6299865	1	58	360	2	4.2	8.45	120	3.84	213	27	22	73.9	37.3	15.5	21.8	6.6	101	1.02	3	44	252	1.84	12.8	1.48	9	5.03	35.28	2	174	3.26	1.4	1.48	0.89	0.3	3	1	0	0	0	0	15628950056	156	88	0	1	1	1
		6289994	1	47	15	3	6	8.36	148	17.41	115.9	20	27	115.9	48.4	22.9	25.5	7	70	1.1	2.39	115	203	2.1	8.49	1.63	5.07	5.08	39.2	2	85	4.05	0.85	2.97	1.4	0.43	3	1	0	0	0	0	13561207219	126	74	1	0	0	0
		6319625	1	58	360	3	7.3	2.54	179	7.18	260	30	28	143.3	55.2	29.4	25.8	4.9	68	0.74	1.87	65.5	202	1.98	6.16	1.25	3.88	6.62	91.32	2	701	8.32	0.96	2.64	1.44	0.25	1	2	0	0	0	0	15275124999	150	95	1	0	0	0
		6331959	1	28	360	3	68	6.18	134	4.79	202	28	23	93	40	23.1	16.9	5.4	84.3	1.45	2.93	62.1	138	2	4.27	1.23	2.34	4.18	136.36	2	73	3.06	0.62	1.37	1.01	0.25	2	2	0	0	0	0	13561052009	139	88	1	1	1	1
22	22	14799	1	65		2	1	3.59	153	17.67	364	31	30	122.3	49.2	26	23.2	5.1	44	1.17	3.68	61.5	283	2.06	5.8	1.4	3.49	2.95	85.35	2	606	7.77	1.58	1.61	0.74	0.34	1	0	0	1	0	0				0	1	0	0
96	103	15433	0	47		1	6.7	2.83	108	7.1	250	12	12		50	31	21	7	42.3	0.58	1.44	31.4		2.34	6	2.97	2.01	4.1	53.37	2					1.13	0.31	1	0	0	1	0	0				1	0	0	0
166	181	6334304	1	49	30	3	12	4.48	151	6.35	322	18	4	103.1	54.5	25.6	28.9	4.7	86	1.08	2.67	45.3	246	2.14	8	1.39	5.04	6.15	91.27	2	1090	8.53	0.81	3.08	1.26	0.38	1	0	0	1	0	0		143	120	0	0	0	0
170	185	6338931	1	32	180	2	1.8	3.78	161	5.36	188	17	19	174.2	69.3	42	27.3	5.1	76	0.83	1.87	59.6	203	2.43	6.65	1.17	4.08	7.58	33.26	2	189	9.88	0.93	1.89	1.35	0.3	1	0	0	1	0	0		156	97	1	0	0	0
188	206	6358894	1	43	210	2	1.1	3.88	159	7.44	236	20	18	109.9	47.4	26.7	20.7	4.4	55	0.86	1.82	61.8	185	2.12	5.81	1.15	3.44	5.46	757.14	2	451	6.84	0.7	2.01	1.28	0.22	1	0	0	1	0	0		140	77	1	0	0	0
		6354218	1	47	180	2	26.9	7.72	138	6.83	350	17	11	104	46.9	22.2	24.7	3.7	74	0.88	1.67	51.2	185	2.03	7.31	1.42	4.68	5.24	27.7	2	401	6.06	0.67	2.73	1.06	0.33	1	0	0	1	0	0	13853750519	141	88	0	0	0	0
124	133	020607	0	46	360	3	59.8	2.84	95	2.9	215	24	17	75.7	43.4	20.4	23	2.9	53	0.67	1.92	26.7	194						191.97	2	536	5.54	0.88	1.15	0.81	0.25	2	0	0	1	0	0	13656354649			1	0	0	0
212	240	6263025	1	35	14	2	1.8	2.97	153	7.14	287	17	15	131.4	52.4	28.9	23.5	3.7	65	0.76	1.75	52.8	178	2.24	5.64	1.06	3.6	5.12	44.97	2							2	0	0	1	0	0		127	97	1	0	0	0
232	262	6261153	0	53	180	3	0.9	3.23	4.1	6.49	276	30	34	136	58.4	32.4	26	1.84	51	0.66	1.84	60.3	187	2.18	3.87	1.02	2.26	5.35	52.59	2	397	12.6	0.68	2.46	1.56	0.36	2	0	0	1	0	0	15288851581	164	97	0	1	0	0
		6290306	0	42	10	1	6.3	1.91	113	5.44	279	24	15	157	50.5	25	25.5	3.9	56	0.64	1.8	48.5	214	2.2	7.16	1.87	3.89	5.15	69.11	2	314	6.05	1.96	2.53	0.95	0.24	2	0	0	1	0	0	18660395836	111	64	0	0	0	0
		6300657	1	43	30	3	1.8		144	7.52	210	19	31	123.4	46.6	20.1	26.5	8.4	73	1.01	1.82	34	204	2.06	15.5	1.49	10.64	3.98	98.73	2	539	5.59	0.77	4.46	1.11	0.31	2	0	0	1	0	0	15264001864	162	105	1	1	0	0
23	23	14231	1	62		4	34.2	10.07	129	10.8	262	21	24	66.1	35.7	16.9	15.8	13	72	1.38	2.64	91	159	1.94	13	2.03	7.9	4.3	361	2	137	1.35	0.52	0.85	0.15	0.49	3	0	0	1	0	0				1	1	0	0
25	25	14601	1	51		4	19.1	3.83	114	4.72	269	14	19		41	22	19	5.2	46.5	1.03	2.63	32.6		2.61	5.1	2.67	2.78	4.7	33.83	2	292	8.38	0.57	3.1	1.16	0.26	3	0	0	1	0	0				1	1	0	0
131	140	019520	1	46	10	4	42.8	9.84	134	4.73	354	17	9	99.5	38.7	17.8	20.9	8.3	106	1.58	3.79	64.3	192	2.48	9	1.51	4.19	6.23	223.46	2							3	0	0	1	0	0	13678626731			1	1	1	1
139	151	020421	0	61	90	3	11.9	9.8	121	5.15	227	20	7	106.9	44.9	19.9	25	8.8	67	1.32	2.78	50.5	199	1.97	10.4	2.17	6.35	5.49	1038.46	2	773	5.83	0.7	2.26	1.41	0.32	3	0	0	1	0	0	18354250580			1	0	0	0
143	155	020531	1	36	150	3	22.2	20.12	141	6.52	198	13	12		39	25	14	7	69.8			70.2		2.34	6.2	1.15	2.77	5.6	80.14	2	640	3.29	0.68	0.8	1.33	0.26	3	0	0	1	0	0	18764103888			0	0	0	0
171	186	6338917	1	46	10	3	14	11.94	158	5.6	181	27	15	136.4	41.1	18.7	22.4	6	81	1.05	4.76	44.7	227	1.94	10.66	1.55	6.67	8.05	27.09	2	409	2.7	1.18	3.05	1.17	0.34	3	0	0	1	0	0		148	84	0	0	0	0
184	200	6351821	0	15	15	3	22.5	7.68	137	7.51	350	21	16	113	51.8	21.5	30.3	5.7	50	0.76	2.26	59.3	231	2.13	14.19	1.95	9.57	6.09	1459.02	2	194	8.19	1.67	3.99	1.48	0.3	3	0	0	1	0	0		108	84	0	0	0	0
219	249	6316458	1	46	90	3	2.9	5.28	135	5.72	311	42	32	88.1	45.1	19.5	25.6	6.5	85	0.96	2.84	64.2	250	2.02	10.27	2.08	6.19	4.95	81.78	2	296	6.15	0.96	2.35	1.24	0.38	3	0	0	1	0	0	15066529497	152	91	1	1	0	0
234	264	6269555	0	20	150	4	34.2	1.09	4.52	15.69	274	23	48	148.8	57.2	33.5	23.7	3.6	47	0.8	1.45	82.7	199	2.44	6.7	2.15	3.75	4.11	70.53	2	150	5.1	0.73	1.4	1.24	0.31	3	0	0	1	0	0	15621373860	131	88	0	0	0	0
		6330433	1	53	10	2	7.2	0.75	129	4.16	297	23	19	110	47.7	23.4	24.3	5.1	67.6	0.9	2.04	54.8	242	2.05	9.51	1.51	6.42	5.05	24.84	2	324	5.94	2.48	3.05	1.15	0.33	3	0	0	1	0	0	15552346015	136	96	1	0	0	0
		6290310	1	38	360	2	3.6	1.82	146	7.24	240	20	19	150.8	49.6	27.1	22.5	5.8	71	0.73	2.06	48.2	164	2.27	6.08	1.46	3.34	4.82	65.61	2	375	5.64	0.91	2.51	0.89	0.16	3	0	0	1	0	0	13639471764	123	77	0	1	0	0
		6280695	1	51	30	3	2	4.74	138	6.89	340	24	15	90.8	42.2	18.4	23.8	6.6	84	0.88	2.68	44.2	204	1.98	11.31	1.15	7.67	4.93	72.01	2	302	5.15	0.47	4.33	1.21	0.29	3	0	0	1	0	0	15066911138	110	68	1	1	0	0
		6356531	0	57	10	3	96.2	2.3	133	6.9	389	22	16	151	43.3	20.1	23.2	5.8	58.4	1	2.13	42.4	253	1.98	9.37	1.57	6.3	5.25	228.54	2	311	4.79	1.45	1.84	1.1	0.27	3	0	0	1	0	0		145	89	1	1	0	0
		6303845	1	45	60	3	5.6	3.86	153	7.59	270	24	16	115.5	51.6	23.6	28	3.9	68	0.77	2.14	42.2	251	2.15	8.46	0.73	5.86	5.38	1365.79	2	612	8.78	0.56	3.87	1.25	0.4	3	0	0	1	0	0	13954391806	137	98	1	0	0	0
122	131	018200	1	27	60	1	5.8	2.49	154	4.84	282	16	12	116.1	47	16.9	20.1	4.4	61	0.88	1.72	48	161	2.18	6.91	0.95	4.61	4.51	51.66	2							3	0	1	1	0	0	15194179070			0	1	0	0
175	190	6337742	1	29	270	3	1.8	9.5	125	5.47	336	34	35	69.4	33.8	15.3	18.5	3.5	68	1.1	3.34	34.1	199	1.95	5.49	1.36	3.31	5.16	25.53	2	219	2.11	1.17	1.3	1.26	0.28	3	0	1	1	0	0		117	71	0	1	0	0
200	226	6372583	0	50	180	3	47.5	7.85	132	6.65	364	15	9	103.1	49.7	22.2	27.5	3.7	58	0.76	1.67	46.4	281	1.97	11.25	1.48	7.62	4.97	182.21	2	561	6.65	1.1	2.56	1.05	0.26	3	0	1	1	0	0		189	131	1	0	0	0
		6321186	0	48	120	3	52.9	3.77	113	3.72	229	20	13	129	57	27	30	4	47.2	0.51	1.45	42.5	276	2.02				6.29	354.38	2	350	7.09	1.36	2.53	1.35	0.3	1	1	0	1	0	0	18265033173	115	79	0	0	0	0
9	9	016168	1	20	31	4	81.6	14.81	147	8.73	285	22	16	21.1	34.3	13.2	21.1	3.5	80	0.88	1.84	35.1	212	1.92	13.1	2.07	8.15	6.31	32.91	2	152	2.06	0.86	1.4	0.98	0.26	3	1	0	1	0	0	17864751921			0	0	0	0
189	210	6361376	0	35	90	3	3.6	10.36	130	6.94	267	17	14	98.6	39.6	16.8	22.8	3.1	44	0.8	2.12	49.8	196	2.01	14.95	1.54	10.51	4.94	481.07	2	346	3.87	1.32	2.65	1.15	0.31	3	1	0	1	0	0		107	63	0	0	1	1
196	217	6366454	1	65	30	3	12.2	4.87	153	5.61	216	29	26	143.1	59.8	35.5	24.3	4.4	66	0.87	1.91	55.4	185	2.31	6.78	1.95	4.02	5.51	47.15	2	1430	9.19	0.96	2.58	0.96	0.27	3	1	0	1	0	0		152	74	1	0	0	0
168	183	6333980	0	53	120	3	2.2	4.98	130	5.92	216	27	15	89.3	50.2	23.4	26.8	5	55	1.19	4.75	39.3	232	1.99	9.54	1.02	6.23	6.12	25.64	2	423	6.88	0.92	2.34	1.38	0.45	2	1	2	1	0	0		130	82	1	0	0	0
138	148	19514	0	50	5	4	6.5	3.29	131	4.42	269	24	24	110.7	46.2	26.6	19.6	7	52	1.15	1.46	56.8	182	1.97	7.4	2.06	4.03	4.21	69.52	2	257	4.78	1.07	1.7	1.19	0.16	3	2	1	1	0	0	13625410659			1	0	0	0
205	233	6264460	1	34	180	3	9.7	11.83	150	5.84	222	23	16	94.1	43.8	20.8	23	5.3	72	0.97	3.18	56.8	151	2.07	9.5	1.56	6.77	4.91	39.43	2	152	4.37	0.23	2.69	0.9	0.24	1	0	0	2	0	0		128	80	0	1	1	1
158	172	6322708	1	54	8	3	12.5	10.99	144	4.75	208	34	37	82.1	36.6	16.2	20.4	6.5	78	0.92	2.16	48.3	200	1.82	11.72	0.86	8.68	5.02	87.02	2							2	0	0	2	0	0		153	104	1	1	0	0
2	2	13368	1	42		3	14.8	7.28	145	8.55	256	16	13	115	51.3	26.6	24.7	4.3	70	0.72	1.76	71.4	253	2.2	10.83	1.84	7.28	9.15	227.88	2	302	4.2	1.18	0.94	1.17	0.39	3	0	0	2	0	0				1	1	0	0
4	4	13469	1	39		2	5.7	6.39	154	6.18	286	17	21		52	32	20	4.8	70.2	0.99	1.67	64.8		2.61	10.3	1.67	5.7	4.7	79.87	2	245	9.62	1.32	2.43	1.08	0.24	3	0	0	2	0	0				0	1	0	0
6	6	12467	0	59		2	29.1	4.04	129	7.02	279	24	12		50	25	25	2.7	56	0.76	2.71	43.9	275	2.08	12.64	1.62	9.68	6	349.87	2	308	7.41	1.47	3.66	1.3	0.32	3	0	0	2	0	0				0	1	0	0
141	153	020395	0	29	10	3	16	2.6	110	3.43	181	15	13	100.5	46.4	22.7	23.7	4.6	53	0.72	1.81	35.8	169	1.96				4.49	127.26	2	527	6	0.75	2	0.87	0.18	3	0	0	2	0	0	15866616543			0	0	0	0
144	157	018462	1	49	7	3	8.3	4.32				13	22	68.1	35.5	17.7	17.8	8.8	67	1.18	1.43	63.7	181	2.59					595.65	2							3	0	0	2	0	0	15356118839			1	0	0	0
197	218	6366770	0	58	10	4	11.7	3.61	159	8.22	216	31	28	137	55.8	28.7	27.1	4.8	72	0.92	2.15	50.9	238	2.04	8.71	2	2.15	5.42	32.95	2	1150	7.65	1.45	4.15			3	0	0	2	0	0		175	96	0	0	0	0
		6361598	1	53	8	3	5.4	2.1	138	5.33	219	18	11	106	48.5	23.5	25	5.4	66	0.9	2.2	75	285	2.05	7.96	1.63	5.4	5.33	85.87	2	603	6.04	1.69	2.15	1.52	0.36	3	0	0	2	0	0	13562056610	136	77	1	0	0	0
		6373927	0	61	10	2	5	2.57	122	7.15	269	53	43	120	54.8	24.5	30.3	5	52.7	1.3	3.55	67.3	289	2.13	5.28	0.97	3.14	4.53	108.72	2	431	7.66	1.3	4.12	1.49	0.35	3	0	0	2	0	0	18766143355	117	74	1	0	0	0
206	234	6266686	1	35	30	3	22.1	7.09	160	5.16	286	31	37	111.1	44.4	22.2	22.2	5.7	81	0.87	2.46	68.3	198	2.09	10.89	1.34	7.9	4.91	83.45	2	425	4.33	1.56	4.22	1.11	0.25	3	0	2	2	0	0		127	86	0	0	0	0
12	12	017096	1	62		3	10.7	8.9	122	9.1	253	22	30		32	20	12	10.2	100.1	1.45	5.23	83.8		2.32	10.6	2.23	6.01	4.6	95.57	2							3	2	0	2	0	0	15865737743			1	1	1	1
146	159	017906	1	48	30	3	4.8	5	160	5.04	270	19	32	82.7	43	27	16	7.3	71.4			116		2.2	8.9	1.64	4.67	6.3	38.87	2	194	3.32	1.19	2.82	1.43	0.45	3		0	2	0	0	18353459423			1	0	0	0
216	246	6248747	1	12	30	1	3.4	2.75	142	7.21	213	44	46	143.4	59.4	31.2	28.2	5.4	80	1.18	3.15	71.9	195	2.29	4.81	0.99	3.05	5.13	61.34	2	496	8.86	0.66	2.06	1.35	0.29	1	0	0	3	0	0		159	98	1	0	0	0
211	239	6263322	0	31	30	3	3.3	9.02	145	6.68	265	28	17	113.9	50.6	23.9	26.7	4.1	62	0.6	1.6	54.8	263	2.16	11.8	1.56	8.91	6.67	76.67	2	531	5.75	1.8	2.15	1.56	0.65	2	0	0	3	0	0		126	86	0	1	0	0
		6263351	1	64	180	2	9.3	7.49	129	7.38	236	21	16	67	46.3	23.7	22.6	7.4	69	1.13	2.73	44.5	250	1.95	9.8	1.61	5.86	5.7	340.51	2	166	5.39	1.25	2.09	1.04	0.36	2	0	0	3	0	0	15066691076	137	86	0	0	0	0
28	28	14280	1	38		2	2	6.17	137	11.26	243	24	56		44	26	18	7.4	53.8	1.38	1.57	66.1		2.55	5.9	1.49	3.04	4.1	72.92	2	306	7.25	0.75	2.27	0.96	0.36	3	0	0	3	0	0				0	1	0	0
169	184	6336444	0	68	8	3	74.3	2.41	130	10.89	239	24	14	100.5	45	23.2	21.8	4.8	50	0.77	2.54	30	190	1.89	9.16	1.39	5.63	6.49	26.07	2	447	5.29	1.26	3.52	0.9	0.17	3	0	0	3	0	0		141	91	1	0	0	0
223	253	6320746	0	75	60	3	15	4	127	7.5	228	29	45	160.5	51.2	28.3	22.9	6	83	1.97	3.02	65.6	213	2.16	9.19	2.12	5.45	4.56	36.9	2	69	4.83	0.78	1.55	1.03	0.33	3	0	0	3	0	0	13853417550	160	93	1	0	0	0
		6297214	0	40	15	2	3.7	6.41	134	4.69	243	16	9	126.5	49.2	23.6	25.6	2.9	53	0.61	1.64	1.64	240	2.2	12.21	1.55	8.59	5.09	863.99	2	252	7.35	1.03	2.37	1.17	0.3	3	0	0	3	0	0	18678511409	139	95	1	0	0	0
135	145	019537	1	31	23	4	14.6	12.05	176	5.87	342	20	44		39	24	15	9.2	98.6			95.2		2.73				4.4	207.16	2	98	2.4	0.79	2.35	1.09	0.45	3	0	2	3	0	0	13287199660			1	1	0	0
226	256	6292198	1	26	360	3	1.8	8.16	155	8.79	240	23	20	115.7	45.2	24.8	20.4	3.6	73	0.84	2.42	53.2	193	2.09	6.14	0.93	3.97	5.23	52.8	2	425	3.75	1.33	0.93	1.25	0.33	3	0	0	0	1	0	13455797448	185	120	0	1	0	0
165	180	6330657	1	62	30	3	9.6	7.49	142	9.44	258	29	49	68.2	36.9	15.9	21	11.3	74	1.96	4.66	66.4	210	2.01	13.36	1.18	9.27	4.46	43.84	2	276	4.82	0.84	2.14	1.15	0.47	1	1	0	0	1	0		174	105	1	0	0	0
		6283064	1	49	60	4	1.6	5.55	157	5.06	320	25	16	137	58.1	32.4	25.7	6.4	74.4	0.72	2.08	56.2	192	2.07	8.51	1.24	5.78	5.51	74.68	2	597	7.38	0.61	2.75	1.33	0.3	3	1	0	0	1	0	13127198295	127	89	1	0	0	0
		6279632	0	57	30	2	5.5	1.2	144	5.35	297	18	14	141	61.4	33.1	28.3	4.8	61.7	0.77	2.02	46.7	260	2.17	15.2	1.58	4.72	5.68	234.21	2	335	6.89	2.15	2.28	1.34	0.34	3	1	1	0	1	0	13605404898	118	80	0	1	0	0
8	8	015920	1	61	7	3	14.3	5.89	131	12.01	223	13	22		35	20	15	9.3	63.6	1.12	2.7	53.7		2.46	7.3	2.23	3.61	4	38.65	2	219	4.1	0.77	2.84	0.95	0.17	3	0	0	1	1	0	13006575567			0	1	1	1
26	26	14255	1	55		2	4.6	7.82	152	5.41	211	22	17	78	41.7	17.8	23.9	3.9	69	0.91	2.97	53.8	244	1.9				4.85	81.12	2	316	4.11	1.35	1.82	1.13	0.34	3	0	0	1	1	0				1	0	0	0
29	29	10107	0	53		2	7.4	7.41	134	5.06	168	19	18		48	30	18	4.5	62.8	1	2.38			2.61	6.8	1.42	3.45	5.3	80.64	2	181	6.42	0.78	2.22	1.57	0.31	3	0	0	1	1	0				0	0	0	0
179	194	6347600	1	15	10	2	32.2	8.55	136	6.4	532	17	14	100	43.3	20.9	22.4	3.9	51	0.84	1.82	38.9	245	2.03	6.54	1.71	3.84	4.53	436.91	2							3	0	0	1	1	0		143	92	0	0	0	0
198	219	6366813	0	20	60	2	14	2.58	122	8.59	291	18	16	102.7	44.6	23.1	21.5	5.7	61	0.8	1.35	66.6	174	2.04				4.78	28.85	2	78	4.81	1.51	1.48	0.99	0.19	3	0	0	1	1	0		127	89	1	0	0	0
		6357703	0	32	360	3	10.6	5.7	113	4.85	314	12	7	96	42.9	21.7	21.2	4	41.2	0.63	1.51	45.1	234.7	2.01	12.79	2.01	8.57	4.5	277.02	2	140	3.29	1.43	0.7	1.36	0.19	3	0	0	1	1	0	13863522088	119	71	0	0	0	0
		6316855	1	22	10	3	5.5	7.02	143	3.02	227	35	36	117	50.3	25.9	24.4	4.9	92.7	0.92	2.58	60.8	220.5	2.05	8.63	1.63	5.44	5.89	380.2	2	464	10	0.63	2.62	1.46	0.37	3	0	0	1	1	0	18396814391	166	91	1	0	0	0
123	132	020890	1	55	90	2	5.7	1.17	136	4.59	184	26	20		42	25	17	4.7	51.7			50.5		2.36	7.6	1.77	5.15	5.1	107.91	2	262	5.87	1.03	1.11	1.06	0.3		0	0	1	1	0	18005448769			1	1	0	0
35	37	13306	1	50		3	18.9	3.71	128	6.58	297	16	37		41	24	17	5.6	36.8	0.75	1.94	50.5		2.52	7.8	1.97	3.98	5.2	42.84	2		4.92					2	0	1	1	1	0				0	1	0	0
150	163	6328643	1	52	90	2	5.4	5.86	151	9.13	187	25	42	112.5	51.6	26.2	26.2	6.6	70	1.3	2.76	89.5	228	2.25	10.77	1.88	6.93	6.52	121.33	2	249	4.87	1.07	1.38	1.51	0.46	1	1	0	1	1	0		118	80	0	0	0	0
160	175	6324867	1	35	20	2	1.8	3.02	169	9.94	235	29	34	100.1	42.7	21.5	21.2	8.1	98	1.49	2.54	88.5	194	2.03	13.7	1.69	9.09	5.05	78.95	2	499	3.98	0.72	2.44	0.97	0.29	2	1	0	1	1	0		138	95	1	0	0	0
5	5	14631	1	46		2	4.2	5.89	144	3.22	207	24	23	108.8	49.8	23.4	26.4	2.9	72	0.7	2.35	56.7	242	2	8.63	1.9	5.14	5.82	193.08	2	427	7.13	1.82	2.5	1.29	0.31	3	1	0	1	1	0				0	1	0	0
121	130	021004	1	33	60	4	16.5	7.96	178	6.19	348	15	35		41	30	11	5.1	68.3			75.7		2.28	7.21			5.04	347.03	2	416	2.87	0.62	2.69	1.13	0.33	3	1	0	1	1	0	18654366383			0	1	1	1
181	196	6349155	1	64	360	2	14.9	2.21	144	4.33	274	28	19	108.7	50.7	25.3	25.4	4.8	55	1.06	3.17	65.2	188	2.09	10.52	1.34	6.69	6.17	121.59	2	76	7.87	0.67	2.49	1.22	0.34	3	1	0	1	1	0		141	91	1	1	0	0
190	211	6361254	1	55	300	2	2.2	1.39	144	15.9	400	13	19	132.1	53.1	31	22.1	8.8	61	1.82	2.98	150.8	209						86.97	2	70	3.7	1.59	1.24	0.94	0.26	3	1	0	1	1	0		146	85	0	0	0	0
192	213	6361567	1	52	90	1	2.2	0.7	147	5.1	259	17	31	114.5	52.5	30	22.5	5.8	88	1.29	1.76	66.5	185	2.2	5.93	2.35	2.92	5.27	84.52	2							3	1	0	1	1	0		128	70	1	0	0	0
		5357658	0	36	30	2	4.2	6.76	103	5.85	240	19	10	90	39	18.1	20.9	2.7	64.7	0.91	2.33	32.6	239	1.96	11.45	1.3	8.33	4.85	197.88	2	272	3.88	1.45	2.59	1.1	0.3	3	1	0	1	1	0		122	80	0	0	0	0
134	144	019380	1	46	30	4	31.9	7.33	160	5.65	294	28	26	108.1	48.5	23.6	24.9	3.5	60	0.9	1.98	47.5	206	2.65	10.63	1.63	6.84	6.06	239.06	2	411	4.71	0.99	1.87	1.2	0.29	3	1	1	1	1	0	15095074207			1	0	0	0
3	3	13336	0	54		3	6.5	4.47	126	6.92	314	57	51		51	30	21	3.07	42.3	1.01	1.69	43.9		2.54	7.4	1	3.95	6.5	109.72	2					1.12	0.24	2	0	0	2	1	0				1	0	0	0
105	113	013143	1	53	20	3	11.7	13.04	147	7.98	270				59.2	31.9			80						8.67				446.75	2	150	4.47	1.52	2.11	1.52	0.31	2	0	0	2	1	0	13969997122			1	1	0	0
195	216	6366982	1	20	30	4	15.1	4.51	131	5.86	208	21	16	109.7	50	26.5	23.5	3.4	51	0.77	1.16	46.9	202	2.24	7.93	2.18	4.75	4.48	228.42	2	356	4.03	1.33	0.81	1.02	0.2	3	1	0	2	1	0		103	71	0	0	0	0
11	11	016730	0	50	180	2	13.7	4.72	112	6.68	396	20	13	64.2	35.9	15.1	20.8	9.1	116	1.72	4.85	54.5	223	1.87	5.1	1.78	2.59	4.76	379.72	2	153	2.58	1.62	1.55	0.81	0.25	3	2	0	2	1	0	13854865582			0	1	1	1
42	46	012783	0	61	60	2	2.8	4.48	104	5.2	217	18	17		47	27	20	5.7	59.3	1.11	2.35	48.3		2.71	5.6	1.56	2.9	4.8	360.64	2	490	7.82	0.8	2.92	1.24	0.34	3	3	1	2	1	0	18866591687			1	1	0	0
		f	1	58	8	2	2.6	1.65	176	6.84	284	18	15	143	76	38.5	37.5	2.9	61.1	1.03	2.31	46.4	217	2.33	7.72	1.13	5.05	6.25	148.46	2	2980	15.5	0.61	3.15	1.4	0.31	3	0	0	3	1	0		144	99	1	0	0	0
228	258	6273342	0	34	360	2	1.1	3.95	116	3.89	257	17	15	195.9	57	31.1	25.9	3.1	30	0.43	1.39	52.2	127	2.14	9.48	1.07	4.07	5.68	51.62	2	933	8.87	0.92	1.9	1.31	0.24	0	0	0	0	2	0	18364084978	139	86	0	1	0	0
213	242	6261632	0	19	5	3		2.35	128	7.87	363	17	12	101.4	46.4	17.3	29.1	3.4	49	0.64	2.22	33.6	258	2.07	8.66	1.39	6.44	4.77	156.69	2	133	6.8	2.55	3.44			1	1	0	0	2	0		116	81	0	1	0	0
163	178	6329697	0	36	8	3	6.1	4.29	157	5.08	208	22	25	148.5	54.7	33.9	20.8	5.9	74	0.92	2.01	84	206	2.02	6.45	0.89	4.33	5.04	212.82	2	97	7.37	0.68	0.76	1.29	0.31	1	0	0	1	2	0				0	0	0	0
10	10	016581	1	54	365	3	8.7	3.6	136	10.61	228	32	28	59.8	44.1	22.7	21.4	12.1	79	1.53	3.19	87.1	238	2.07	11.9	1.88	7.07	4.36	63.31	2	124	4.02	1	2.16	1.22	0.33	3	0	0	1	2	0	15165739951			1	1	1	1
204	232	6273816	1	27	5	3	16.2	15.53	120	7.52	258	19	14	85.2	39.9	19.5	20.4	5.8	96	0.99	3.76	42.5	180	1.96	9.42	1.3	6.84	5.16	39.43	2	255	3.39	1.28	2.21	0.94	0.24	1	0	2	1	2	0		118	97	1	1	1	1
222	252	6284421	1	35	90	3	5.8	11.57	140	4.57	240	18	14	80.3	36.6	14.9	21.7	3	79	0.76	2.37	45.5	227	1.9	9.72	1.15	5.9	4.89	333.73	2	383	4.74	1.04	1.77	0.92	0.25	3	2	0	1	2	0	18653365398	148	76	0	1	1	1
		6286084	0	48	360	0	2.5	1.31	109	6.4	281	16	13	159.9	50.7	27.5	23.2	6.1	66	0.94	1.77	56.2	148	2.17	0.56	1.46	3.69	4.53	63.49	2	217	6.82	1.09	1.85	0.29	0.12	2		1	1	2	0	13969230695	136	91	0	1	0	0
218	248	6248936	1	37	30	2	1.9	3.92	179	5.84	247	29	25	96.9	41.2	21.1	20.1	2.9	56	0.8	2.34	69.8	187	1.99	13.87	1.17	9.97	4.61	128.79	2	111	2.93	0.66	1.8			1	0	0	2	2	0		153	102	0	1	0	0
		6264632	0	59	90	1	5.7	1.31	130	6.89	274	15	18	87	54.8	29.9	24.9	4.3	71.6	1.11	2.65	54.9	265	2.26	6.23	1.8	3.05	4.76	81.96	2	241	8.24	1.06	1.4	0.99	0.32	2	0	0	2	2	0		130	77	1	0	0	0
		6355168	0	24	60	3	11.4	7.07	124	6.47	382	27	14	125.6	48.3	22	26.3	3.7	61	0.78	1.7	47.5	244	2.05	12.45	1.45	7.29	4.98	66.11	2	297	3.7	2.97	2.01	1.52	0.31	3	2	1	2	2	0	18764466010	128	89	1	0	0	0
215	245	6248945	0	68	180	3	47.6	10.42	123	5.56	271	19	10	85.2	44.5	17.7	26.8	3.9	51	0.92	3.06	34.7	225	1.95	13.85	1.22	9.95	4.97	1372.77	2	415	5	1.03	3.08	1.32	0.39	1	0	0	3	2	0		189	102	0	0	0	0
36	38	13327	0	50		2	18.6	5.67	107	3.76	209	18	17		47	21	26	4	45.2	1.01	2.82	41.3		2.48	7.8	1.63	4.52	4.9	1151.66	2	155	4.1	0.91	3.13	0.73	0.31	2	0	0	3	2	0				1	0	0	0
210	238	6260787	0	23	30	4	39.9	3.71	140	7.56	327	34	24	207.6	52.5	24.2	28.3	4.6	51	0.78	2.47	47.2	245	2	12.66	2.21	8.52	5.76	55.88	2							3	0	0	3	2	0		108	61	0	0	0	0
229	259	6249762	1	71	180	1	21.9	1.88	4.21	5.6	244	25	15	101.7	58.7	27.3	31.4	6.1	53	0.91	3.2	36	206	2.08	6.52	1.29	4.49	5.91	44.81	2	1360	15.8	1.39	5.83	1.09	0.28	3	0	2	3	2	0	13791090457	180	103	0	0	0	0
230	260	6253401	0	71	10	4	10.3	15.53	4.2	6.21	282	31	15	105.2	50.1	21.8	28.3	3.62	75	1.15	3.62	40.9	270	2.14	15.72	1.51	11.98	5.78	456.74	2	411	5.3	0.76	3.99	1.37	0.31	3	0	2	3	2	0	15965625327	167	88	1	1	1	1
20	20	14803	1	58		3	1.3	14.35	124	5.35	297	23	14	101.4	36.8	15.6	21.2	5.5	81	1.07	2.98	51.6	203	1.96	12.6	1.96	8.38	5.66	65.6	2	154	3.62	1.15	2.45	1.48	0.33	0	0	0	0	0	1				1	0	0	0
153	167	6330390	0	31	30	2	9.5	4.64	137	5.64	291	26	36	115.2	47.6	24.5	23.1	4.1	53	0.81	1.82	43.4	242	2.02	8.61	2.07	5.06	5.35	48.51	2	696	6.33	1.77	1.57	1.09	0.27	1	1	0	1	0	1		113	77	0	1	0	0
157	171	6323516	1	28	5	3	2.9	3.74	171	8.87	222	23	22	118.4	46.2	25.2	21	4.8	95	0.93	2.09	62.8	262	2.14	9.78	1.11	6.61	5.08	93.54	2							0	1	0	2	0	1		136	99	0	0	0	0
164	179	6329637	1	73	30	3	2.2	1.46	144	5.31	245	14	17	121.3	52.9	31.8	28.3	5.7	68	1.08	2.43	62.7	189	2	7.54	1.37	4.88	7.6	258.74	2							3	0	0	1	1	1		114	74	1	0	0	0
161	176	6330381	0	66	30	3	80.9	3.77	165	8.1	385	20	15	124.5	55.4	27.1	28.3	2.8	49	0.67	1.62	50.7	249	2.17	10.83	1.64	7.22	5.89	37.11	2	253	8.43	1.44	2.84	1.45	0.47	2	1	1	1	1	1		170	83	0	1	0	0
		6279723	0	45	15	3	16	1.54	135	11.3	324	16	17	127.2	60.7	31.7	29	3.7	45	0.56	1.61	43.6	175	2.04					166.12	2	435	9.71	0.63	2.18	1.09	0.2	1	1	0	1	0	2	15552599785	125	96	1	0	0	0
156	170	6323516	1	33	2	3	2.2	5.05	152	15.91	304	25	18	99.9	35.5	17.2	18.3	4.3	67	1.03	1.72	70	182	1.99	8.11	2.78	3.88	4.25	222.75	2	394	3.12	1.38	1.61	0.84	0.17	3	0	0	2	0	2		142	77	0	0	0	0
43	47	003997	0	55		3	13.2	13.38	131	9.92	241	15	25	89	42.5	20	22.5	7.1	56	1.27	2.2	61.6	264	1.97	10.57	1.62	7.62	7.47	493.78	2		2.62	1.38	2.51	1.19	0.24	3	1	0	3	0	2	15192157333			1	0	0	0
176	191	6343859	1	27	360	1	3.6	3.89	167	11.51	379	12	14	144.3	54.7	35.2	19.5	5.7	76	0.95	1.45	74.9	177	2.33	7.02	1.48	4.32	5.41	41.55	2	74	4.31	0.91	1.54	1.3	0.29	3	0	0	1	1	2		125	75	1	0	0	0
126	135	020092	1	48	120	3	22.4	4.84	142	5	326	25	16		40	26	14	10.1	76.2			68.4		2.73	8.6	1.45	4.63	5.9	60.14	2	205	3.88	0.75	4.22	1.13	0.33	3	1	3	1	1	2	13869297137			1	1	0	0
50	54	0002845	1	63		2	2.2	2.44	118	5.92	208	17	11	117	51	29.4	21.6	5.5	72	1.02	1.72	39.7	184	2.05				4.94	31.32	2		8.65	0.72	2.19	1.08	0.26	3	3	1	3	1	2	15854704099			1	1	0	0
173	188	6339013	0	43	360	2	2		119	2.03	146	28	19	102	58	20.3	37.7	3.7	40	0.77	3.49	41.8	231	2.02	6.47	1.36	3.75	5.57	20.91	2	228	17.5	1.32	2.87	1.09	0.2	2	3	0	2	3	2		139	89	1	0	0	0
79	85	009757	1	61	30	3	38.4	5.91	150	5.47	279	17	17		44	25	19	6.5	73.1	0.93	2.04			2.52	8.8	2.03	5.66	5.2	68.96	2	251	6.86	0.37	2.28	0.98	0.26	3	2	3	3	2	3	15588865862			1	0	0	0
82	89	015809	1	28	20	4	12.5	6.2	182	10.75	322	36	87		38	21	17	4.5	48.3	1.14	1.42	61.6		2.3	10.4	1.77	6.56	5	93.31	2	135	3.22	0.7	2.05	1.4	0.32	2	0	0	0	0		17602268643			0	0	0	0
60	64	015393	0	35	60	3	8.5	5.37	121	6.96	285	16	10	103.1	44.2	25.4	18.8	3	42	0.6	1.43	47.8	200	2.07	6.4		3.41	4.42	400.54	2							3	0	0	0	0		131531612817			0	1	0	0
80	87	015278	1	33	2	3	2.7	8.28	167	7.66	260	43	32	125.3	52.6	27.3	25.3	6.8	76	0.67	1.58	97.9	284	2.07	10.5	1.49	3.81	4.86	243.06	2	223	6.06	2.35	3.29			3	0	0	0	0		13455081866			0	0	0	0
116	124	017219	0	48	7	3	92.5	3.52	115	3.97	329	55	42		37	19	18	4.1	56.4	0.67	2.32	20.7		2.18	11.6	2.39	6.98	6.3	515.41	2	386	5.38	1.22	2.22	1.56	0.36	2	0	0	1	0		18806409878			1	0	0	0
84	91	016096	1	49	270	4	8.3	6.02	125	11.63	184	7	14		38	24	14	7.8	38.2	1.1	1.79	56		2.44	6.6	2.28	3.19	6.8	88.9	2	266	4.24	1	2.03	1.02	0.23	3	0	0	1	0		13884693005			1	0	0	0
87	94	016961	0	53	180	2	3.3	3.61	135	3.81	278	18	26		47	27	20	3.1	56.4	0.6	1.78	44		2.57	7	2.28	3.17	4.7	57.93	2	254	8.22	0.86	1.66	1.6	0.17	3	1	0	1	0		13561236933			0	0	0	0
91	98	017782	1	50	10	1	2.9	3.5	127	5.67	298	31	28		50	26	24	5.3	42.9			50.4		2.44	7.1	1.39	4.22	5.3	152.11	2	972	10.1	1.14	2.74	1.24	0.25	2	0	0	2	0		15865944331			0	0	0	0
93	100	011352	1	69	30	2	36.7	5.5	148	8.6	310	23	52		41	23	18	6.9	70.9	1.46	2.12			2.44	7.6	3.03	3.34	4.6	155.75	2	60	5.09	0.67	2.97	1.31	0.28	2	0	0	2	0		13013540602			1	0	0	0
117	126	016327	1	41	15	3	4.4	5.9	142	7.85	282	19	18	135.9	53.2	27.7	25.5	7.4	82	0.92	1.91	78	240	2.04	9.2	1.99	5.06	4.6	355.67	2	992	4.27	1.1	2.91	1.18	0.23	2	0	0	2	0		15339986538			1	0	0	0
34	35	13368	1	42		3	14.8	7.28	130	8.55	256	18	50	99	51.7	28	24.7	6.1	69	1.02	1.85	75.8	232	2.2	9	2.15	4.98	3.75	227.88	2	302	4.2	1.18	0.94	1.17	0.39	3	0	0	2	0					1	1	0	0
85	92	016324	1	37	30	3	4.79	4.79	125	4.62	161	27	22		38	23	15	6.3	62.7	0.77	2.41	54.5		2.42	4.8	1.68	2.4	5.2	147.13	2	430	2.82	1.54	2.23	1.24	0.27	3	0	1	2	0		15106932972			0	0	0	0
81	88	015560	1	60	30	3	2.9	5.94	126	5.05	130	31	34	96.8	47.7	26.5	21.2	4.4	78	1.05	2.4	46.7	265	2.42	5	1.6	2.3	4.9	34.35	2	434	4.28	1.09	2.1	1.26	0.3	3	0	0	1	1		13716125357			0	0	0	0
89	96	017561	0	53	180	3	28.3	5.1	123	9.41	291	22	19		44	25	19	3.7	47.7			45.9		2.54	7.1	1.43	4.05	4.7	342.53	2	171	4.53	2.13	1.19	1.22	0.38	3	0	0	1	1		13225309612			1	0	0	0
83	90	015851	0	51	180	3	2.6	5.07	141	7.63	287	33	28		57	33	24	3.2	59.9	0.89	1.97	39.9		2.46	8.6	2.02	4.4	4.8	423.15	2	213	9.08	1.76	2.95	1.43	0.29	2	1	0	1	1		15064965018			1	0	0	0
86	93	016651	1	59	180	2	9.6	4.8	144	4.55	209	18	23		42	26	16	5.4	64.7	0.81	3.51	67		2.48	7.5	1.63	4.35	5.4	76.4	2	162	4.55	1.17	1.13	1.13	0.38	3	1	0	1	1		13256416923			0	1	0	0
90	97	017258	1	30	30	3	4.7	4.3	140	6	361	14	3	109.7	38.8	20.6	18.2	6	79	1.14	3.07	56.4	146	2.03	5.5	1.55	2.59	5.14	81.69	2	65	3	0.67	2.17	1.1	0.25	3		1	1	1		15020169321			1	0	0	0
94	101	011116	0	31	60	4		4.52	129	11.63	309	10	12		37	20	17	4.8	52.8	0.74	1.62			2.24	11	1.56	7.72	7.9	221.07	2	95	2.51	1.1	1.63	1.34	0.39	3	0	0	2	1		15264979168			0	1	0	0
58	62	011544	1	60	180	3	47.4	4.73	141	9.85	278	18	9		43	22	21	5.3	71.8	1.03	1.95	51.1		2.71	11.2	1.16	6.27	5.9	88.42	2	339	7.58	1.03	2.23	1.6	0.34	3	0	3	2	1		13953170515			0	0	0	0
57	61	011314	1	43	60	1	47.4	11.04	125	9.13	430	13	21	62.6	46.3	18.4	27.9	2.8	60	0.74	1.77	35.5	241	1.95	6.12	1.08	4.29	4.51	25.82	2	394	6.63	1	2.05	1.42	0.38	3	2	0	2	1		15069528407			1	0	0	0
71	77	009267	1	31	120	4	77.9	5.38	122	7.62	271	15	9		30	18	12	7.8	72.2	1.18	2.26			2.28	10.7	1.86	5.95	4.6	92.41	2	265	2.01	0.95	1.35	0.95	0.24	3			2	1		15966183318			0	1	0	0
75	81	008962	1	40	60	4	18.9	5.33	143	6.48	313	17	11	90.1	39.4	17.3	22.1	4.3	81	1.1	2.28	57.2	185	2.24	9.59	1.46	5.04	6.4	299.24	2	270	4.14	0.44	2.32	1.65	0.36	3			2	1		15953161786			0	1	1	1
55	59	011157	0	45	90	1	20.1	3.56	117	3.77	251	22	23	120.1	51.6	25.6	26	4	47	0.58	1.65	45.3	277	2.42	8.7	2.94	4.47	4.5	28.12	2	135	6.59	2.82	1.81	1.35	0.24	2	2	1	2	2		15964211429			0	0	0	0
68	72	007554	1	44	90	3	7.4	4.32				21	19	107.1	43	21.2	21.8	4.1	65	0.99	2.2	57.4	205	1.83	9.22	1.21	6.96	3.95	76.75	2	1320	4.32	0.81	3.4	1.05	0.26	3		2	3	2					1	0	0	0
73	79	009783	1	51	20	4	11.2	6.9	92	5.42	312	13	16		43	23	20	7.4	81.6	1.08	3.15			2.46	15.5	1.64	11.8	5.9	51.46	2	341	6.06	0.38	2.4	1.49	0.46	3			3			18302499843			0	1	0	0
120	129	020538	1	46	180	3	13.3	4.98	152	11.08	364	17	24	85.2	48.8	20.8	28	6.3	97	1.4	2.67	85.8	177	2.42				5.84	160.55	2	532	4.7	0.52	3.13	0.9	0.18							18854759200			0	0	0	0
183	199	6348321	0	34	330	2	1.5	2.03	123	14.25	252	18	48	121.3	54.2	34.3	19.9	4.4	48	0.94	1.28	88.99	148	2.19	8.89	1.72	5.34	4.71	68.7	2	151	4.96	1.43	1.02	1.15	0.2								162	98	0	1	0	0
193	214	6362542	0	38	9	3	12.3	6.81	149	6.67	210	18	25	118.3	47	27.1	19.9	4.3	73	0.92	1.61	73.1	191	2.05	5.48	1.22	3.31	6.23	385.12	2	110	3.41	0.72	2.27	1.29	0.31								153	104	0	0	0	0
		6278952	1	49	1440	3	1.8	7.05	155	6.32	210	23	21	116	44.6	24.5	20.1	6.7	73.3	0.89	2.72	54.9	154.7	2.04	9.23	1.34	6.03	5.12	102.39	2	262	3.18	0.41	2.77	0.81	0.22							18369874299	141	89
[truncated: 7 more columns]
